# Supplementary material for: Consumption of ultra-processed foods and the incidence of hypertension: a cohort study
Source: Royal Society of Chemistry journal article supplement (doi:10.1039/d4fo03110e), 2024-01-01
Supplement: d4fo03110e1.pdf [file d4fo03110e1.pdf]

Supplementary Table 1. Food Frequency Questionnaire

| No. | Food items                     | Portion size                     | How often |        |         |        | Comments |
|-----|--------------------------------|----------------------------------|-----------|--------|---------|--------|----------|
|     |                                |                                  | Daily     | Weekly | Monthly | Yearly |          |
| 1   | Lavash bread                   | 1 slice                          |           |        |         |        |          |
| 2   | Barbari bread                  | 1 slice                          |           |        |         |        |          |
| 3   | Sangak bread                   | 1 slice                          |           |        |         |        |          |
| 4   | Taftoon bread                  | 1 slice                          |           |        |         |        |          |
| 5   | Baguette bread                 | 1 small                          |           |        |         |        |          |
| 6   | Toasted bread                  | 1 slice                          |           |        |         |        |          |
| 7   | Cooked rice                    | 1 plate                          |           |        |         |        |          |
| 8   | Cooked pasta                   | 1 plate                          |           |        |         |        |          |
| 9   | Potato                         | 1 medium                         |           |        |         |        |          |
| 10  | French fries                   | 10 number                        |           |        |         |        |          |
| 11  | Baked vermicelli (soup noodle) | 1 cup                            |           |        |         |        |          |
| 12  | Ash noodle (Reshteh)           | 1 cup                            |           |        |         |        |          |
| 13  | wheat flour                    | 1 cup                            |           |        |         |        |          |
| 14  | Cookies                        | 1 number                         |           |        |         |        |          |
| 15  | Crackers                       | 1 number                         |           |        |         |        |          |
| 16  | Yazdi cake                     | 1 number                         |           |        |         |        |          |
| 17  | Homemade cake                  | 1 medium slice                   |           |        |         |        |          |
| 18  | Other cakes                    | 1 number                         |           |        |         |        |          |
| 19  | Corn                           | 1 medium                         |           |        |         |        |          |
| 20  | Barley                         | 1 tsp                            |           |        |         |        |          |
| 21  | Bulgur                         | 1 cup                            |           |        |         |        |          |
| 22  | Lentil                         | 1 cup                            |           |        |         |        |          |
| 23  | Beans                          | 1 cup                            |           |        |         |        |          |
| 24  | Chickpea                       | 1 cup                            |           |        |         |        |          |
| 25  | Broad bean                     | 1 cup                            |           |        |         |        |          |
| 26  | Soy bean                       | 1 cup                            |           |        |         |        |          |
| 27  | Mung bean                      | 1 cup                            |           |        |         |        |          |
| 28  | Split chickpea                 | 1 cup                            |           |        |         |        |          |
| 29  | Beef                           | 1 slice                          |           |        |         |        |          |
| 30  | Lamb meat                      | 1 slice                          |           |        |         |        |          |
| 31  | Ground beef                    | 1 tablespoon                     |           |        |         |        |          |
| 32  | Chicken with skin              | 1 medium piece                   |           |        |         |        |          |
| 33  | Chicken without skin           | 1 medium piece                   |           |        |         |        |          |
| 34  | Fish (except tuna)             | 1 medium piece (one palm full)   |           |        |         |        |          |
| 35  | Tuna (canned)                  | 1/2 cans                         |           |        |         |        |          |
| 36  | Hamburger                      | 1 number                         |           |        |         |        |          |
| 37  | Sausage                        | 1 number (Germany * cocktails *) |           |        |         |        |          |
| 38  | Beef ham                       | 1 slice                          |           |        |         |        |          |
| 39  | Heart, liver and kidney        | 1 slice                          |           |        |         |        |          |
| 40  | Egg                            | 1 number                         |           |        |         |        |          |
| 41  | Tripe and Rennet               | 1 piece                          |           |        |         |        |          |
| 42  | Tongue                         | 1 whole number                   |           |        |         |        |          |
| 43  | Brain                          | 1 whole number                   |           |        |         |        |          |
| 44  | Kalle-Kind of organ meat       | 1 number                         |           |        |         |        |          |

|    |                           |                  |  |  |  |  |  |
|----|---------------------------|------------------|--|--|--|--|--|
| 45 | Pache-kind of organ meat  | 1 number         |  |  |  |  |  |
| 46 | Pizza                     | 1 slice          |  |  |  |  |  |
| 47 | Skimmed milk              | 1 cup            |  |  |  |  |  |
| 48 | Low-fat milk (< 2%)       | 1 cup            |  |  |  |  |  |
| 49 | Whole milk (> 2%)         | 1 cup            |  |  |  |  |  |
| 50 | Cacao milk                | 1 cup            |  |  |  |  |  |
| 51 | Chocolate milk            | 1 cup            |  |  |  |  |  |
| 52 | Concentrated yogurt       | 1 tablespoon     |  |  |  |  |  |
| 53 | Plain yogurt              | 1 cup            |  |  |  |  |  |
| 54 | Full fat yogurt           | 1 cup            |  |  |  |  |  |
| 55 | Cream yogurt              | 1 tablespoon     |  |  |  |  |  |
| 56 | Cheese                    | 1 slice          |  |  |  |  |  |
| 57 | Cream cheese              | 1 slice          |  |  |  |  |  |
| 58 | Dough                     | 1 cup            |  |  |  |  |  |
| 59 | Cream                     | 1 tablespoon     |  |  |  |  |  |
| 60 | Traditional ice cream     | ½ cup            |  |  |  |  |  |
| 61 | Non-traditional ice cream | ½ cup            |  |  |  |  |  |
| 62 | Butter                    | 1 slice          |  |  |  |  |  |
| 63 | Margarine                 | 1 slice          |  |  |  |  |  |
| 64 | Kashk                     | 1 tablespoon     |  |  |  |  |  |
| 65 | Shredded lettuce          | 1 cup            |  |  |  |  |  |
| 66 | Tomato                    | 1 medium         |  |  |  |  |  |
| 67 | Cucumber                  | 1 medium         |  |  |  |  |  |
| 68 | Fresh Herbs               | 1 small plate    |  |  |  |  |  |
| 69 | Cooked greens             | 1 cup            |  |  |  |  |  |
| 70 | Pumpkin                   | 1 medium         |  |  |  |  |  |
| 71 | Squash                    | 1 medium         |  |  |  |  |  |
| 72 | Eggplant                  | 1 medium         |  |  |  |  |  |
| 73 | Celery                    | 1 cup            |  |  |  |  |  |
| 74 | Green peas                | 1 cup            |  |  |  |  |  |
| 75 | Green beans               | 1 cup            |  |  |  |  |  |
| 76 | Raw carrots               | 1 medium         |  |  |  |  |  |
| 77 | Cooked carrots            | 1 medium         |  |  |  |  |  |
| 78 | Garlic                    | 1 clove          |  |  |  |  |  |
| 79 | Raw onion                 | 1 small          |  |  |  |  |  |
| 80 | Fried onions              | 1 tablespoon     |  |  |  |  |  |
| 81 | Cabbage varieties         | 1 cup            |  |  |  |  |  |
| 82 | Bell peppers              | 1 medium         |  |  |  |  |  |
| 83 | Raw spinach               | 20 medium leaves |  |  |  |  |  |
| 84 | Cooked spinach            | 1 cup            |  |  |  |  |  |
| 85 | Turnip                    | 1 medium         |  |  |  |  |  |
| 86 | Small green pepper        | 1 medium         |  |  |  |  |  |
| 87 | ketchup                   | 1 tablespoon     |  |  |  |  |  |
| 88 | Pickles in vinegar        | 1 tablespoon     |  |  |  |  |  |
| 89 | Salted vegetables         | 1 tablespoon     |  |  |  |  |  |
| 90 | Pickled cucumber          | 1 medium         |  |  |  |  |  |
| 91 | Cantaloupe                | ¼ number         |  |  |  |  |  |
| 92 | Melon                     | 1 medium slice   |  |  |  |  |  |
| 93 | Watermelon                | 1 medium slice   |  |  |  |  |  |

|     |                        |                |  |  |  |  |  |
|-----|------------------------|----------------|--|--|--|--|--|
| 94  | Pear                   | 1 medium       |  |  |  |  |  |
| 95  | Apricot                | 1 medium       |  |  |  |  |  |
| 96  | Cherries               | 10 number      |  |  |  |  |  |
| 97  | Apple                  | 1 medium       |  |  |  |  |  |
| 98  | Peach                  | 1 medium       |  |  |  |  |  |
| 99  | Nectarine              | 1 medium       |  |  |  |  |  |
| 100 | Green plum             | 1 medium       |  |  |  |  |  |
| 101 | Fresh figs             | 1 medium       |  |  |  |  |  |
| 102 | Dried figs             | 1 medium       |  |  |  |  |  |
| 103 | Grape                  | 1 medium bunch |  |  |  |  |  |
| 104 | Kiwi                   | 1 medium       |  |  |  |  |  |
| 105 | Grapefruit             | 1 medium       |  |  |  |  |  |
| 106 | Orange                 | 1 medium       |  |  |  |  |  |
| 107 | Persimmon              | 1 medium       |  |  |  |  |  |
| 108 | Tangerine              | 1 medium       |  |  |  |  |  |
| 109 | Pomegranate            | 1 medium       |  |  |  |  |  |
| 110 | Date                   | 1 medium       |  |  |  |  |  |
| 111 | Plums (yellow and red) | 1 medium       |  |  |  |  |  |
| 112 | Sour cherry            | 10 number      |  |  |  |  |  |
| 113 | Strawberry             | 3 number       |  |  |  |  |  |
| 114 | Banana                 | 1 medium       |  |  |  |  |  |
| 115 | Sweet lemon            | 1 medium       |  |  |  |  |  |
| 116 | Lemon                  | 1 medium       |  |  |  |  |  |
| 117 | Grapefruit juice       | 1 cup          |  |  |  |  |  |
| 118 | Orange juice           | 1 cup          |  |  |  |  |  |
| 119 | Apple juice            | 1 cup          |  |  |  |  |  |
| 120 | Cantaloupe juice       | 1 cup          |  |  |  |  |  |
| 121 | Cranberry              | 1 cup          |  |  |  |  |  |
| 122 | Fresh Pineapple        | 1 cup          |  |  |  |  |  |
| 123 | Canned Pineapple       | 1 cup          |  |  |  |  |  |
| 124 | Raisins                | 1 tablespoon   |  |  |  |  |  |
| 125 | Persian cantaloupe     | 1 cup          |  |  |  |  |  |
| 126 | Fresh mulberry         | 10 number      |  |  |  |  |  |
| 127 | Dried mulberry         | 20 number      |  |  |  |  |  |
| 128 | Dried Peach            | 10 number      |  |  |  |  |  |
| 129 | Dried apricot          | 10 number      |  |  |  |  |  |
| 130 | Green Olive            | 10 number      |  |  |  |  |  |
| 131 | Canned fruits          | 1 can          |  |  |  |  |  |
| 132 | Hydrogenated oils      | 1 tablespoon   |  |  |  |  |  |
| 133 | Liquid Oil             | 1 tablespoon   |  |  |  |  |  |
| 134 | Olive oil              | 1 tablespoon   |  |  |  |  |  |
| 135 | Tallow (fat)           | 1 medium slice |  |  |  |  |  |
| 136 | Ghee                   | 1 tablespoon   |  |  |  |  |  |
| 137 | Mayonnaise             | 1 tablespoon   |  |  |  |  |  |
| 138 | Peanut                 | 20 number      |  |  |  |  |  |
| 139 | Almond                 | 10 number      |  |  |  |  |  |
| 140 | Walnut                 | 1 number       |  |  |  |  |  |
| 141 | Pistachios             | 10 number      |  |  |  |  |  |
| 142 | Hazelnut               | 10 number      |  |  |  |  |  |

|     |                                        |               |  |  |  |  |  |
|-----|----------------------------------------|---------------|--|--|--|--|--|
| 143 | Seeds (watermelon, pumpkin, sunflower) | 1 cup         |  |  |  |  |  |
| 144 | Sugar cube                             | 10 number     |  |  |  |  |  |
| 145 | Sugar                                  | 1 teaspoonful |  |  |  |  |  |
| 146 | Honey                                  | 1 teaspoonful |  |  |  |  |  |
| 147 | Jams (by type)                         | 1 tablespoon  |  |  |  |  |  |
| 148 | Soft drinks                            | 1 cup         |  |  |  |  |  |
| 149 | Pastries                               | 1 medium      |  |  |  |  |  |
| 150 | Creamy pastries                        | 1 medium      |  |  |  |  |  |
| 151 | GAZ                                    | 1 medium      |  |  |  |  |  |
| 152 | Candy                                  | 1 number      |  |  |  |  |  |
| 153 | SOHAN                                  | 1 Piece       |  |  |  |  |  |
| 154 | Puff                                   | 1 pack        |  |  |  |  |  |
| 155 | Chocolate                              | 1 number      |  |  |  |  |  |
| 156 | Caramel cream                          | 1 tablespoon  |  |  |  |  |  |
| 157 | Tea                                    | 1 cup         |  |  |  |  |  |
| 158 | Salt                                   | 1 tablespoon  |  |  |  |  |  |
| 159 | Broth(only water)                      | 1 cup         |  |  |  |  |  |
| 160 | Chips                                  | 1 pack        |  |  |  |  |  |
| 161 | Coffee                                 | 1 cup         |  |  |  |  |  |
| 162 | Lemon juice                            | 1 teaspoonful |  |  |  |  |  |
| 163 | NABAT                                  | 1 medium      |  |  |  |  |  |
| 164 | Mushroom                               | ½ cup         |  |  |  |  |  |
| 165 | Homemade HALVA                         | 1 tablespoon  |  |  |  |  |  |
| 166 | Halva Ardeh                            | ¼ number      |  |  |  |  |  |
| 167 | NOGHL                                  | 10 number     |  |  |  |  |  |
| 168 | Donuts                                 | 1 number      |  |  |  |  |  |
